# Supplementary material for: Sense through wall human detection using UWB radar
Source: Springer Nature journal article supplement (doi:10.1186/1687-1499-2011-20), 2011-06-21

Display No Target Scans

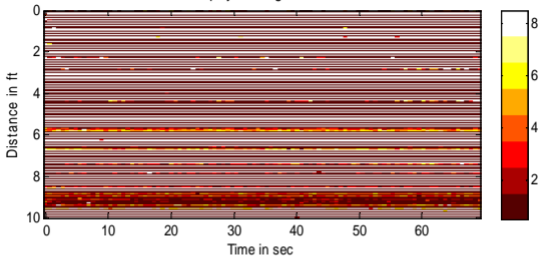

Display Target Scans

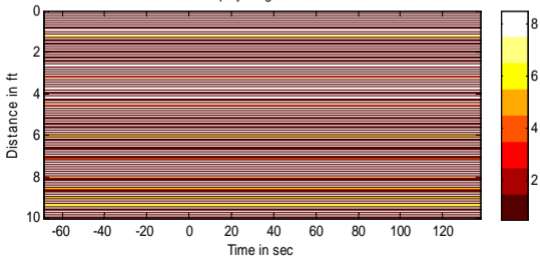

Supplement: 13638_2011_27_MOESM6_ESM.pdf [file 13638_2011_27_MOESM6_ESM.pdf]
