# Supplementary material for: Sense through wall human detection using UWB radar
Source: Springer Nature journal article supplement (doi:10.1186/1687-1499-2011-20), 2011-06-21

DFT across scans - No target

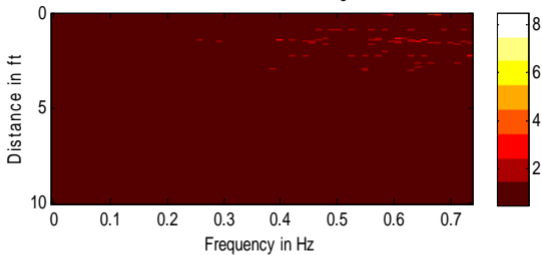

DFT across scans - Target

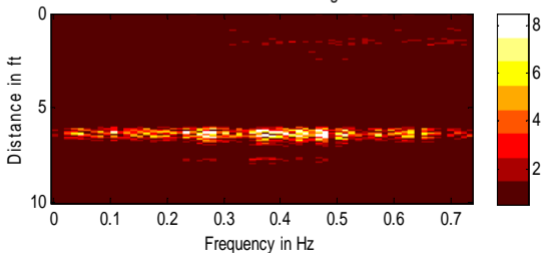

Supplement: 13638_2011_27_MOESM7_ESM.pdf [file 13638_2011_27_MOESM7_ESM.pdf]
