# Supplementary figures and images for: Sense through wall human detection using UWB radar
Source: Springer Nature journal article supplement (doi:10.1186/1687-1499-2011-20), 2011-06-21

DFT across scans - No target

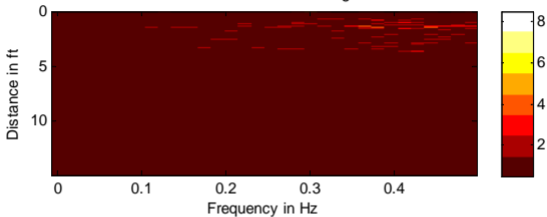

DFT across scans - Target

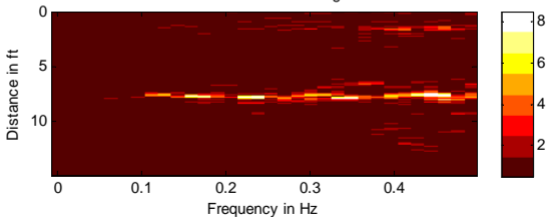

Supplement: 13638_2011_27_MOESM10_ESM.pdf [file 13638_2011_27_MOESM10_ESM.pdf]

DFT across scans - No target

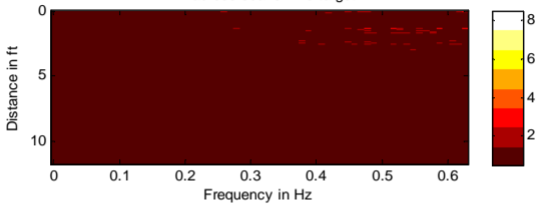

DFT across scans - Target

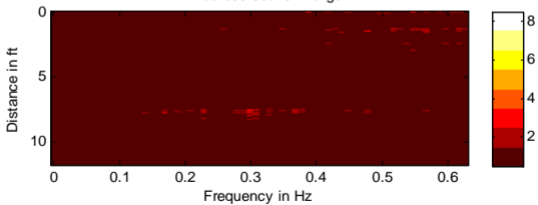

Supplement: 13638_2011_27_MOESM11_ESM.pdf [file 13638_2011_27_MOESM11_ESM.pdf]

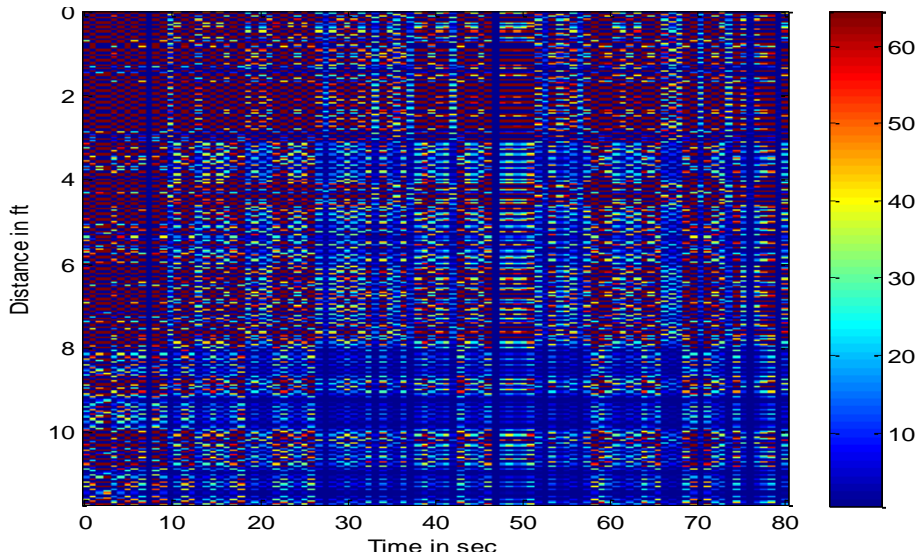

Supplement: 13638_2011_27_MOESM16_ESM.pdf [file 13638_2011_27_MOESM16_ESM.pdf]

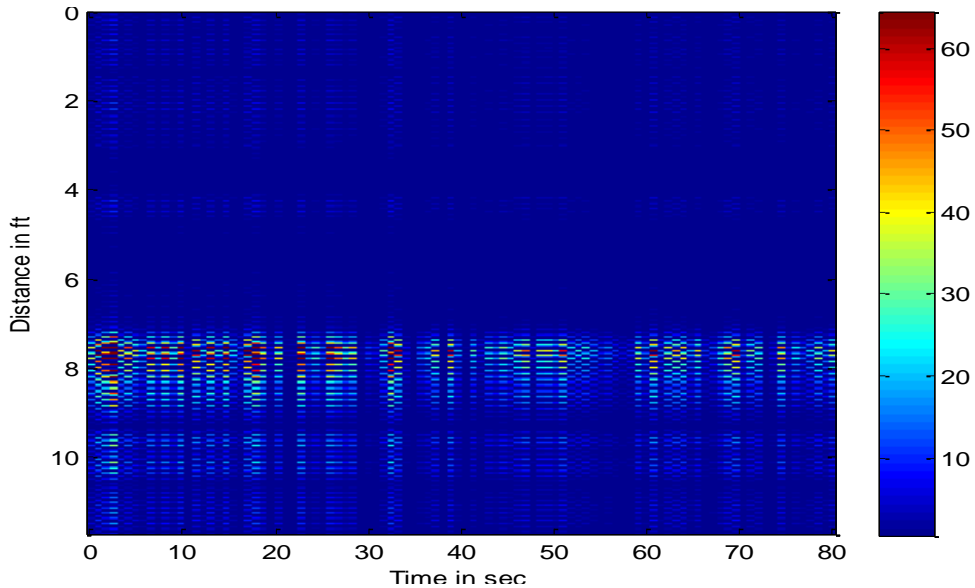

Supplement: 13638_2011_27_MOESM17_ESM.pdf [file 13638_2011_27_MOESM17_ESM.pdf]

DFT across scans - No target

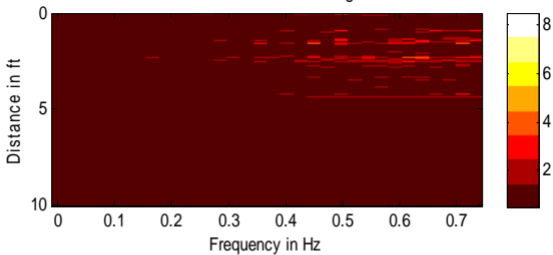

DFT across scans - Target

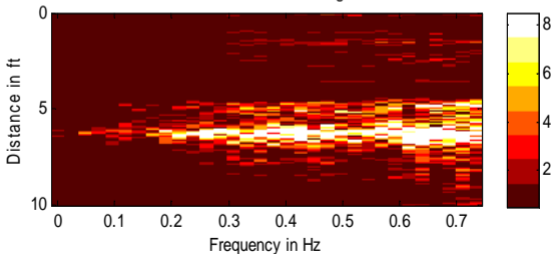

Supplement: 13638_2011_27_MOESM8_ESM.pdf [file 13638_2011_27_MOESM8_ESM.pdf]

DFT across scans - No target

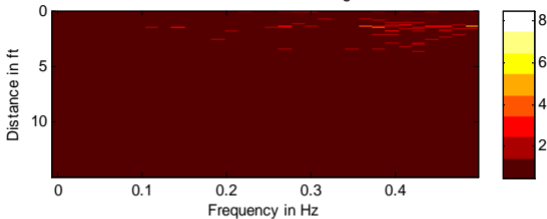

DFT across scans - Target

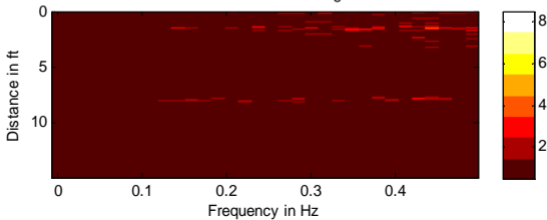

Supplement: 13638_2011_27_MOESM9_ESM.pdf [file 13638_2011_27_MOESM9_ESM.pdf]
